# Supplementary material
Source: PubMed Central journal article supplement (PMC2676230)

Supplementary Figure 2

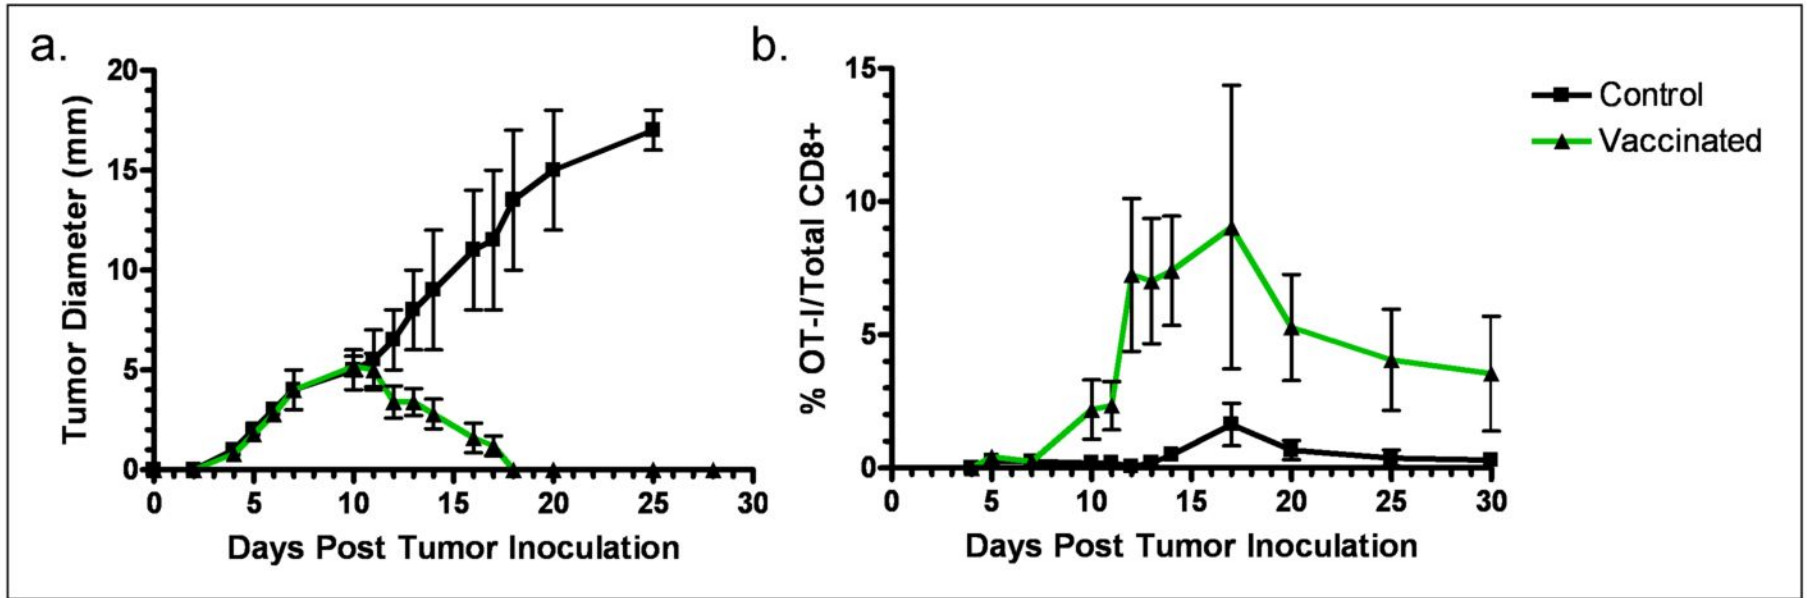

Supplement: NIHMS86072-supplement-Supp_Figure_2.pdf [file NIHMS86072-supplement-Supp_Figure_2.pdf]
